# Supplementary material for: Involvement of miR-190b in Xbp1 mRNA Splicing upon Tocotrienol Treatment
Source: PubMed Central journal article supplement (PMC7795057; doi:10.3390/molecules26010163), 2020-12-31

**Supplementary Figure S1.** Effects of  $\gamma$ T3 (20  $\mu$ g/mL for 24 h),  $\delta$ T3 (10  $\mu$ g/mL for 24 h) in HeLa cell transfected with pre-miR-190b (pre190b) and anti-miR-190b (an190b) on mRNA expression of Xbp1. BFA (2.5  $\mu$ g/mL for 8 h) was used as inducer of EndoR stress. Results are reported as mean  $\pm$  SD of data obtained from 9 independent experiments. Bars show log<sub>2</sub> Fold Change (treated vs control). CC, control cells. Data were analysed by Kruskal-Wallis test. *p*-values  $\leq$  0.05 were considered statistically significant.

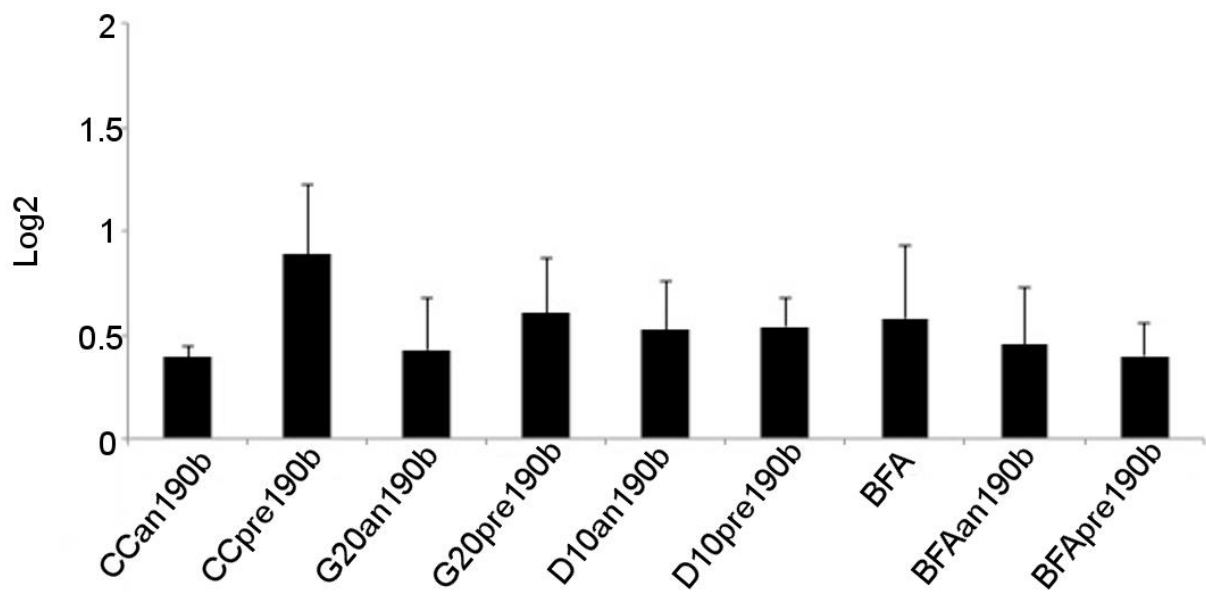

**Supplementary Figure S2.** Validation of cellular model. Effect of  $\gamma$ T3 (20  $\mu$ g/mL for 24 h) and  $\delta$ T3 (10  $\mu$ g/mL for 24 h) on miR-190b expression by RT-PCR, in HeLa cell transfected with pre-miR-190b (pre190b) and anti-miR-190b (an190b). TUN (5  $\mu$ g/mL for 4 h) and BFA (2.5  $\mu$ g/mL for 8 h) were used as inducer of EndoR stress. The figure shows data obtained from 5 independent experiments. Bars show log<sub>2</sub> Fold Change (treated vs control). CC, control cells. Data were analysed by one-way ANOVA with repeated measures followed Tukey's test. Different letters indicate significant differences ( $p < 0.05$ )

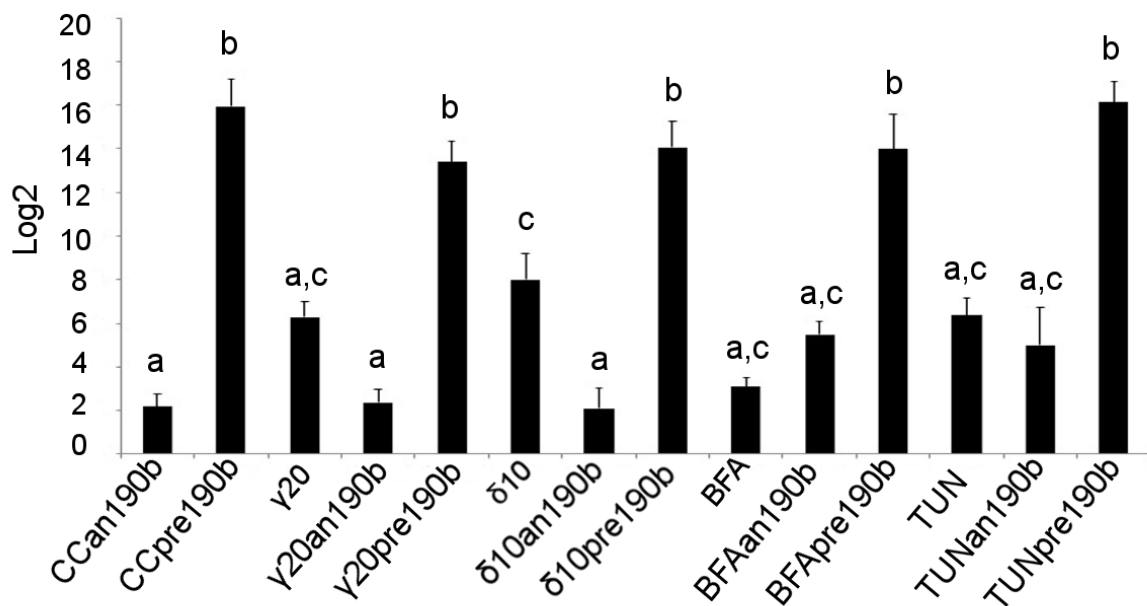

Supplement: molecules-26-00163-s001.pdf [file molecules-26-00163-s001.pdf]
